# Supplementary material
Source: PubMed Central journal article supplement (PMC4581983)
Supplement: NIHMS715352-supplement-2.pdf [file NIHMS715352-supplement-2.pdf]

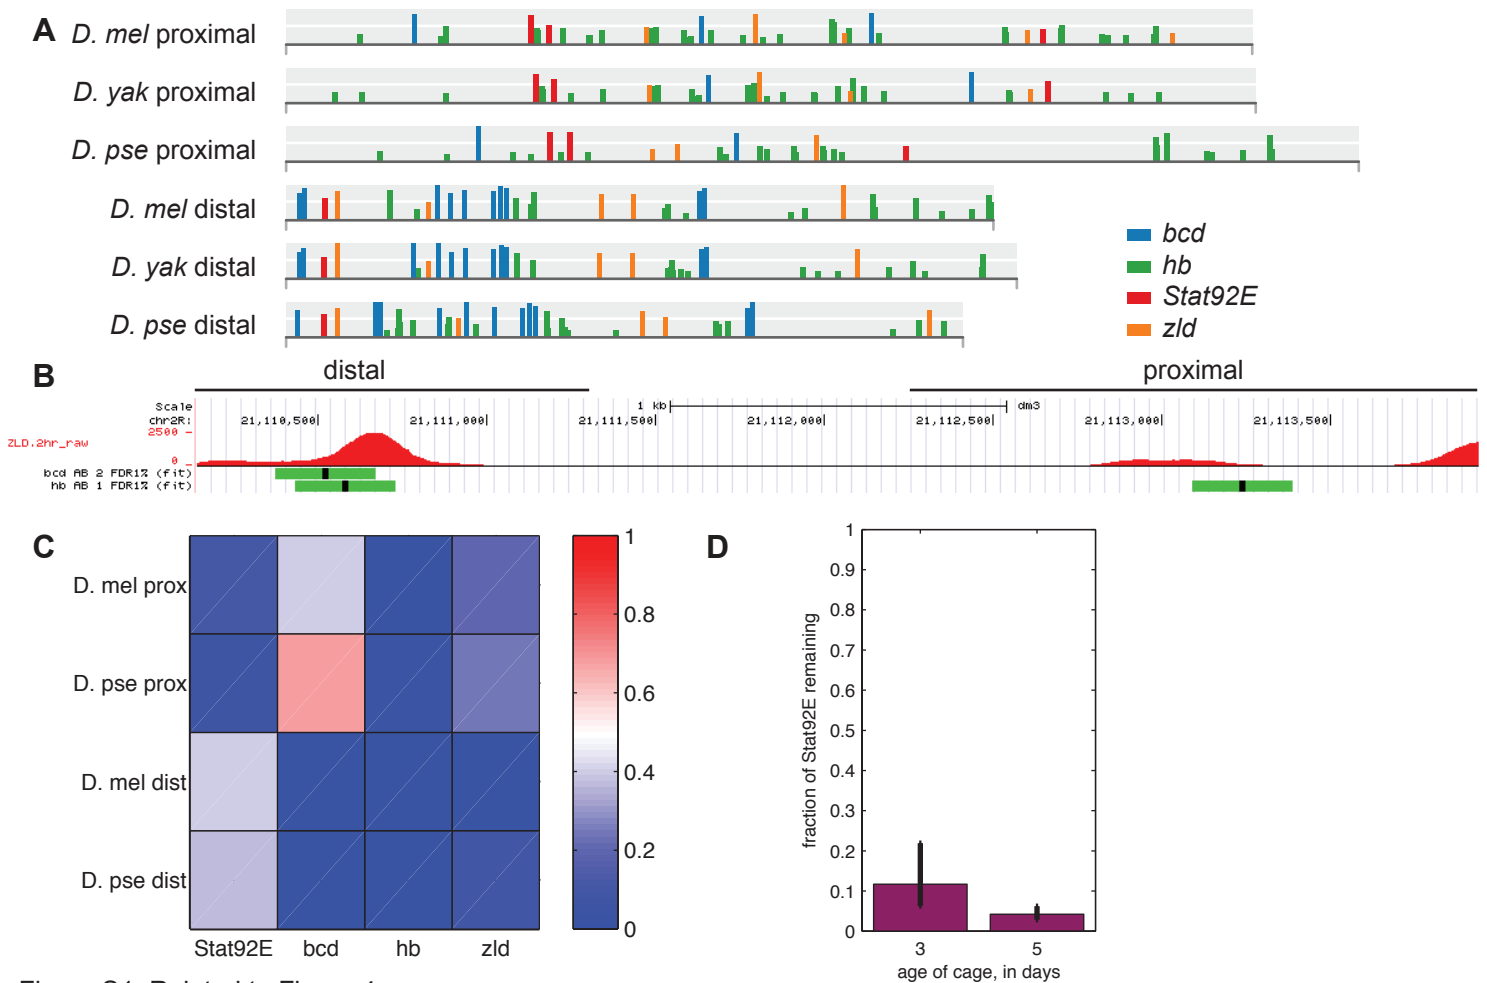

Figure S1, Related to Figure 4

**A** Here we display the binding sites as colored boxes within the proximal and distal *Kr* enhancers from three species. We identified the binding sites using PATSER, as described in the Experimental Procedures, and visualized them using InSite (<http://www.cs.utah.edu/~miriah/insite/>). The box height corresponds to binding site strength, in arbitrary units.

**B** Here we display the transcription factor binding, as measured by ChIP-seq, in blastoderm-stage embryos. The *zld* data are from (Harrison M., et al. *PLoS Genetics*, 2011), and the *bcd* and *hb* data are from (MacArthur S., et al., *Genome Biology*, 2009), as processed in (Harrison M., et al. *PLoS Genetics*, 2011). The tracks were accessed via <http://eisenlab.org/data/ZLD>. There is no ChIP-seq data for Stat92E in blastoderm-stage embryos. These binding data generally agree with the computational analysis presented in Figure 4A. The distal enhancer is bound by *zld*, *bcd*, and *hb*, and the proximal enhancer is bound by *hb* (and weakly by *zld*).

**C** Here we show the p-values associated with the transcription factor binding site over-representation scores shown in Figure 4A. These values correspond to the likelihood of seeing at least the number of observed binding sites in each enhancer. We calculated them by comparing the expected number of binding sites in each enhancer to the observed number of binding sites with the binomial distribution. The number of trials equals the length of the enhancer.

**D** Using the shRNA-based system, we can knock down 88-96% of mRNA Stat92E expression. We plot the fraction of Stat92E expression remaining in Stat92E RNAi embryos from cages that are 3 and 5 days old. The error bars show standard error of the mean from three biological replicates. To measure the level of Stat92E knock down, we used qPCR. We collected 0-2 hour old Stat92E RNAi embryos and GFP RNAi embryos, as a control. We bleached the embryos for 2 minutes in 50% bleach and then snap-froze them in liquid nitrogen. Using the protocol described here [<https://dgrc.cgb.indiana.edu/files/CGB-TR-200610.pdf>], we extracted total RNA from 50-100  $\mu$ L of embryos. We generated cDNA using the SuperScript First-Strand Synthesis System for qPCR and 1 microgram of total mRNA. We performed quantitative PCR using the TaqMan Universal PCR Master Mix and TaqMan Gene Expression Assays for Stat92E and actin-5C as a housekeeping control. On an Eppendorf RealPlex2 real time PCR machine, we ran a PCR program as follows: 95°C for 10 minutes, followed by 40 cycles of 95°C for 15 seconds and 60°C for 1 minute. Ct values were determined automatically using the included Eppendorf software. We calculated the  $\Delta$ Ct value by subtracting the actin Ct from the Stat92E Ct for both the Stat92E and GFP RNAi embryos and averaged this value for the three biological replicates. We then calculated the  $\Delta\Delta$ Ct value as the mean  $\Delta$ Ct(Stat92E) -  $\Delta$ Ct(GFP). We converted this into fold change (fraction of Stat92E remaining) as  $2^{(-\Delta\Delta$ Ct)}. Using the three biological replicates, we calculated the standard error of the mean (SEM) of  $\Delta$ Ct and added these to get the SEM of  $\Delta\Delta$ Ct. To calculate the error bars in fold-change-space, we then performed the same calculations with  $\Delta\Delta$ Ct  $\pm$  SEM( $\Delta\Delta$ Ct). The fraction of Stat92E remaining decreases between embryos collected from 3 day old and 5 day old cages, but the difference is not statistically significant.

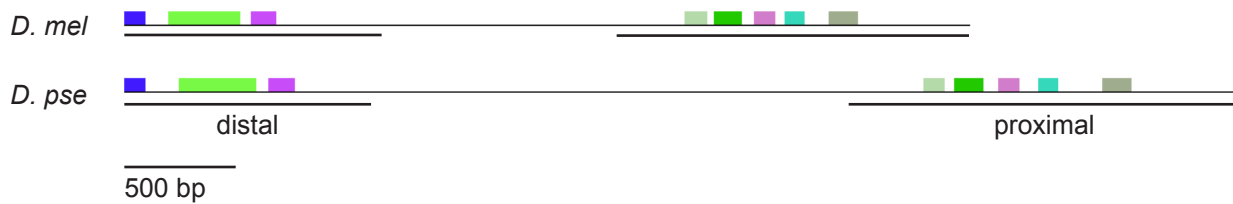

Figure S2, Related to Figure 1A

Using the TOUCAN workbench for regulatory sequence analysis, we searched for conserved regions in the sequences upstream of *Kruppel* in *D. melanogaster* and *D. pseudoobscura* (Aerts S., et al., *Nucleic Acids Research*, 2005). The colored blocks indicate regions of conservation, as identified by LAGAN, using default settings. These regions are only found within the proximal and distal enhancers (underlined regions), suggesting that we are not missing any conserved regulatory regions in our single enhancer reporter constructs.

**A** combined reporters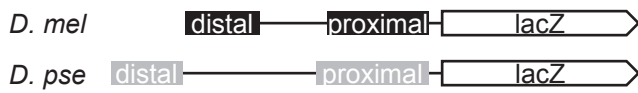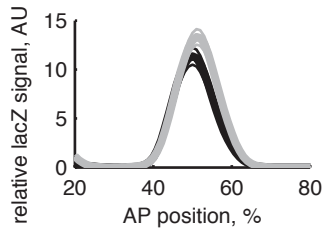**B** proximal reporters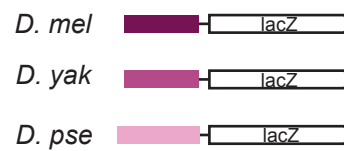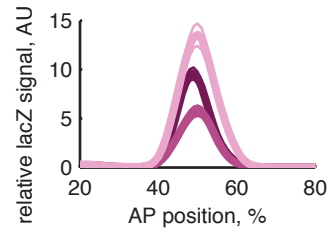**C** distal reporters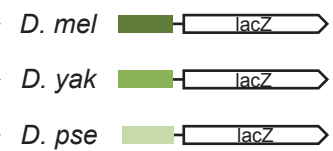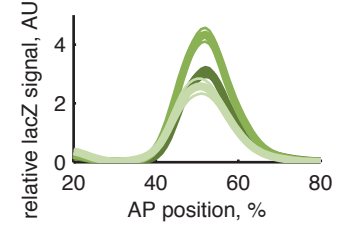

Figure S3, Related to Figures 1 and 2.

Here we show the expression along the anterior-posterior axis driven by the combined and individual enhancer reporters for older blastoderm-stage embryos (26-100% membrane invagination). Each measurement was made using 14-37 embryos. The combined constructs still drive a conserved level of expression, while the individual constructs do not.

**Table S1. Numbers of embryos measured for each experiment**

| <b>Construct</b>                | <b>Background</b>        | <b><i>n</i></b> |
|---------------------------------|--------------------------|-----------------|
| <i>D. mel</i> proximal & distal | WT                       | 13              |
| <i>D. yak</i> proximal & distal | WT                       | 12              |
| <i>D. pse</i> proximal & distal | WT                       | 14              |
| <i>D. mel</i> proximal          | WT                       | 14              |
| <i>D. yak</i> proximal          | WT                       | 24              |
| <i>D. pse</i> proximal          | WT                       | 17              |
| <i>D. mel</i> distal            | WT                       | 19              |
| <i>D. yak</i> distal            | WT                       | 16              |
| <i>D. pse</i> distal            | WT                       | 13              |
| <i>D. mel</i> lambda spacer     | WT                       | 14              |
| <i>D. pse</i> lambda spacer     | WT                       | 18              |
| Chimera 1                       | WT                       | 25              |
| Chimera 2                       | WT                       | 26              |
| <i>D. mel</i> proximal          | <i>Stat92E</i> RNAi      | 23              |
| <i>D. pse</i> proximal          | <i>Stat92E</i> RNAi      | 12              |
| <i>D. mel</i> distal            | <i>Stat92E</i> RNAi      | 15              |
| <i>D. pse</i> distal            | <i>Stat92E</i> RNAi      | 12              |
| <i>D. mel</i> proximal          | <i>bcd</i> RNAi          | 10              |
| <i>D. pse</i> proximal          | <i>bcd</i> RNAi          | 10              |
| <i>D. mel</i> distal            | <i>bcd</i> RNAi          | 15              |
| <i>D. pse</i> distal            | <i>bcd</i> RNAi          | 17              |
| <i>D. mel</i> proximal          | WT (Fig. 4D)             | 13              |
| <i>D. mel</i> proximal          | <i>hb</i> mis-expression | 14              |
| <i>D. mel</i> distal            | WT (Fig. 4D)             | 16              |
| <i>D. mel</i> distal            | <i>hb</i> mis-expression | 9               |



tagttcgaatttaccacccggcgagctctgagcgtccttggcctacctac  
aaaacaaaaataccgatctacacacatcttcagcataaatttagcacag  
catgtccttgccataaaaatctacataaaaccattttaaagtcaatccgc  
aaaagtcacagaagacgtccatgcaagcagaaacattacaacgctctcta  
accgttttttatgatggttttttctacctgaatgctgttttttactagttc  
cttttttacgatttcttttttagacgtgtgccaataattagttagccatt  
aaactgaacttccacttttttgagactttgctcaacaggctacaagcgaa  
gggaaaaaactcactcagtctagctggtaaaaaaagtcgacctttttc  
ttgctttgtgcacttcttatgccgatgtttgtttacttctgttctactc  
ttacagcgcacgcttgaattcaaccccgtccatgacatctcttttcgtg  
acttttggtctttttgctctcgtgtttccctttcgcccagttctctatt  
ggcgttcatcccccttatccagcttagataatttttataactcgaatgta  
aaaaggggaaatgaccaagacacatctgagtgagttttttatacgttcc  
ttagctactttgataactcctacgtgatctttatttggagtaatatccc  
gcaagtgcagcttttatgaaggctctataaaacacaagcggaagtggta  
taggtattaaaaaatgtcctttaatggtaaacacatagttttgattttt  
atgttttatgactgactagaaacgcacaggtcataaaaccctcttctgag  
cgaagatacttttcaacggcatcctatgttataaaaacctcatcgtccata  
ttggactccagcaaaactaaatgtcttccggcattgaaaggaactggctgtc  
tcgttcgcactaatttgcataatgaaaaatcagcacttttaggtataaaaa  
ggaaccgatgaaatccactcactcaactcagagaagtaccca

>dpse-Kr-proximal

gttagtttttcaagtttgaaccttatcaacaaactatacgcacttttcat  
acgcactactgccccacttatgtgcaaacatattggtcgcacaagtgtgtg  
aaagtctcagtcgtcgaatttttcttactcttaatttcatattttaa  
ctcgttttcttttactctcgtccgacactagatatacttgactttgctcc  
atagataaccagcaacgtcttatcgcatactgcccgatcttaataaaatc  
atgtgagctaagtttctttgtcaatatcaagcgaaggcagcaaacatgt  
agaaaagtatttctgactaatccgcaaacctgggcattagctgacgatgc  
tctcgaacgagtcagatcggctcaaaaatcagaaatccttatcaatagg  
tcatttttgggtgcttgaattttgtttaatgctttctgcaatttttgag  
agttttgcgaaaattttcgtgaaactgatcttgttcggttggttgacaga  
aaccattcgaattttacgtaataattatgcagagcaaggatatccatgtcc  
tttttggtctattgttcaatttactttcgaaaatttccacggtagttcgc  
attaccgcctgcccagttctctgtttgttctcgtccttggcctacctacg  
caaaccagcagcagatctgggccatcttcagcataagttctgcacagc  
atgtccttgccataaaaatctacataaaacgatttagaagtcaatccgca  
aaagtcaactgccaacgttttaataacaaaaataaattcaaaaaatatac  
catgcttaaatatgtatgtacgagatgtttgactgttttttattaagggc  
ctttgacttggttttggtttctacctggcctgttttttatcagttccttt  
tttatgactcatttttttagacgtgtgccaacaattagtaaccattacgc  
agaatatataattcccaagcattcctgaccacaggctatatagaacaac  
agtcctctcttctgttccgggatcccttaaaagtatcaaggggcaata  
ctacaactggattcgtccatagagctgccgcgcacacaaagagagcga  
gaaagcagaactagaagaggggaaatggctcaccatgtagaaatacacct  
cgaaggtgatatttctgctagcttccgggtcactcttacagcgcacgcttg  
gatttccaccccatctatgacatctctttccatgaggcttgcgtctttcg  
ctccctctcttgccctatcgcctgactctcctttggcattagtttcatcc

ccttcgtttccccttctggccttatgtacaaaggggaaatctcgtttgagg  
ggaaattcagttttctaccgtttcgaaatagtggcctcagatccttgct  
ccactttaattgccttcaagtgcactttttttatgaaggctctaaaa  
aacaagagtagcgggaagtggccttaagtttttaaggcctcccataggtag  
cgcatagttttgatTTTTTttttttatgactgcagaatataaaaaatgca  
gtgtcataaaatcgtgaaggTTTTTtacacgtacggcgcaaagtatttg  
actaaaagtcaacattTTTTTgggtgaactgtagaggacataagtatgtgt  
gtcagtacataaggacaccacgTTTTtgagattTTTaaatgtgctagcta  
tccctgtcgctccaatttgcataggaaaaatcaacagtcgtctgtctctt  
aggtaaaaagta

>dmel-Kr-distal

gggatcctaagtttaactataatccaggcttaatcactggatcaataacta  
agtagcattttccgggatggaaatataagttacctgcatatgcctaccg  
atcctgaaaactgctttaacttaatcgacatgcatgataaaaaagcaa  
tttgctacaatttatattTTTTTgcttttcttcttttaagcatctggga  
tctggatcagaaaagaaaaagtgtaacgcctaccttcagaaacggattaa  
attTTTTcagacaaataatccagccttaagcatggtgattaagcttgatc  
ccctaccaagggcgtaatatgacggattttccttaaaccctctgtta  
atctccggcttagagcgcgacgcgTTTTTcgcgactccgctgcattgt  
TTTTTTTTcagtttctcaattcgcaagaaggcaggcctatggaccgaa  
tgaggatcataattatggaattcctaaataaactaagaagggcagtcggc  
atagtattgatctacctgtaagcgtgggttctatctttgcccctcgcatt  
cgagactctctagtcacaggtagaccagccttgagttcgtcggcaattaa  
gaagtcaaatttctcttaaaaaacaacaaaaatgtcaaagtaaaaaaat  
gcaaaaaatatagtgtaactgaaactaaatccggcttaggattcttgctca  
taacatgactagggagccattaaaatttgataatttgcatgtcacttgt  
gcaccgtaaacgaagccaacacatcggctgaaaccagcgtcatttatgc  
tatgctatctcactcttttgcataattTTTTTaaattattgacttgtctt  
TTTTacgaatgcaaaggaagtacttgtgtacttccgTTTTTcaaagtccg  
atttattatctacctgcaatttataatgacaaccaagTTTTTaaattc  
caaacgtggTTTTTgagttcaataagcttattTTTTTaaaggctctt  
tcgaaccacattaacatttgcggttacgTTTTTgtagaaattttccatag  
ctgcataaagggtacaagtttctttatttgatgggaaaatgaattagaga  
ccagcacgatctttaacagaaacaaaaaggcgtggatattgttatatgta  
caaaaacaac

>dyak-Kr-distal

gggctcctaagtttaactataatcccagcttaatcactggatcagtagcta  
agtagcattttccggaatggaaatataggagctacctgcttaagtctaccg  
atcttgacaactgTTTTTtaacttaatcgatcatgggtcataaaaagcaa  
tttgctacaatttatattttcctatgcttttacctcttttagagcagatgg  
gacctggattaggaagaaaaaatgttacgtctaccttcagaaacggatt  
aaattTTTTcagacaaataatccagccttaagcatggtgattaagcttga  
tcccctaccaagggcgtaatatgacggattttccttaaaccctcggg  
taatctccggcttagagcgcgacgcgTTTTTcgcgactccttctgcat  
tgTTTTTcactttctcaattcgcaagaaggcaggcctaagaaccgaat  
gaggatcataattatggaattcctaaatacactaaggaggcagtcgaca  
tggcgttgatctacctgtaagcgtgggttccgcttttgccccttgaattc

gagactctctgggtcacaggtagtcaatattccagccttgagatcgtcggc  
aattaagaagtcaaatttcacttaaaaaacaaaaaaatgtcaaaggaaaa  
acaatgcaaaaaatgtagtaactgaactaaatccggccttaggattcttg  
catcataaacatggccaggcagcctttaaaatttgatcatttgcatgtca  
ctcttgaccgtaaacgaaaccgccacataagttgaaactcagcgttatt  
agctatctcactctttcgcaccacttttttaaaattttgacttgtctttt  
ttacgaatgcaaaggaaagaattttttacaaggaagtacttgtgtacttc  
cgttttttaatggccaattttattattagactttttacctgctattttatt  
atggctaacaagttttttaactttccgaatcatggttgttttaaaggta  
ataatcaacatctagaatataaacattttttgtaaacgctctttcaaaaa  
tattaactactcagaccatatcgacgtataaagttaacgtttaggcagaa  
attttttagcaaaaggataagtctttttttttatagaaaaaaataga  
caccagaagaatatttgacaaggacaagtaggcgtggatataagttcaac

>dpse-Kr-distal

gggctccttttagttaactataatccttgactgatcactggatcagtggt  
aagcaacattttccgggaccgaaatgatcaatttacctgccttgccac  
tgcccactggtccactgatcatttgaacagtttaactggtataactta  
cccaggattaaactttttcttcatgcctgataataaaaaaaaaaattgga  
caattcgtttggtttgcaggcttttacctcttttgagcagctgtccct  
cggattacgagagagaaaaaacctttgagtctacctccaagacggatt  
aaatttttcaacaataaagtcagcttaagcatggcgattaagcttga  
tcccctgcaatggcgtaataattgatggattttcctttaaatccttatcc  
taatctccggccttagagagcggcgcgattttttcgcggctcggctctgtt  
ttgtttttcttttctttccttttcttttcttcaattcgcaagaacgca  
ggcctttgggccaatgaggatcataattatggaattccaaaatacactga  
gaaaggcagacagagagagcactgaagctcagctacctgtaagcgtgggt  
atcgtatcctcttcgcctatcacaggtaccagaccagaccggaccagac  
tagaccagccttgagttggtggcaattaagaagtc aaatttcgcttaaaa  
accaaagaaaaaagatcgcagcaaaaaacaaagcaaaaaatgttgcagag  
ctgaactaaatccggattaagaatggctgtcctaaggctttgcatcata  
aacaaggcaggattcctagcggcattgtgcatttgcatattaccaacgg  
atcgtaaacgaattcgccgcgaaaacagcctcacatatgtatgtaccgac  
cataccaacaataccaaccacctagtcagctgcctcgtcctttccaaca  
gtttatagctctggccttgactttttacgaaagtgagcggtttgactttt  
taccgtctgttgatgacttgcctccgcacttttaagttttttatgattag  
tcctacctggggtttatgactattttagagttttttaaccggccaaactgg  
aagagtttt

>dmel-Kr-proximal+distal

gggatcctaagttaactataatccaggcttaatcactggatcaataacta  
agtagcattttccgggatggaaatgatgaagttacctgcatatgcctaccg  
atcctgaaaactgctttaacttaatcgacatgatgatcataaaaagcaa  
tttgctacaattttatattttttgcttttctttcttttaagcatctggga  
tctggatcagaaaaagaaaaagtgtaacgcctaccttcagaaacggattaa  
attttttcagacaaataatccagccttaagcatggtgattaagcttgatc  
ccctaccaaggggcgtaataattgacggattttccttaaatccctctggtta  
atctccggccttagagcgcgacgcggtttttcgcgactccgcctgcattgt  
ttttttttcagtttcttcaattcgcaagaaggcaggcctatggaccgaa



tgaggatcataattatggaattcctaataaactaagaagggcagtcggc  
atagtattgatctacctgtaagcgtgggttctatctttgccctcgcatt  
cgagactctctagtcacaggtagaccagccttgagttcgtcggcaattaa  
gaagtcaaatttctcttaaaaaacaacaaaaatgtcaaagtaaaaaaat  
gcaaaaaatagtgtgaactgaactaaatccggcttaggattcttgcgta  
taaacaatgactagggagccattaaaatttgataatttgcatgtcacttgt  
gcaccgtaaacgaagccaacacatcggctgaaaccagcgtcatttatgc  
tatgctatctcactcttttgcataatttttttaattattgacttgtctt  
ttttacgaatgcaaaggaagtacttgtgtacttccgtttttcaaagtccg  
attttattatctacctgcaatttataatgacaaccaagtttttaacattc  
caaacgtgggttttttgagttcaataagcttcattttttaaggctcttt  
tcgaaccacattaacatttgcggttacgtttttgtagaaattttccatag  
ctgcataaagggtacaagtttcatttatttgatgggaaaatgaattagaga  
ccagcacgatctttaacagaaacaaaaaggcgtggatattgttatatgta  
caaaaaaacatggcatatacgtatgtattgtatatcctaattcggcct  
tcctcttatttaatacacttgaataattttcaactatacagatcagcaat  
caaagttcttgatccaatcgctatagtaaccagatgcgcaagctgataat  
ttattgaaaactttttcttaggattcttccatattaagcattttcccttg  
ctgtgacctcgattcaaaagaaagcactgatttaatgcaggtaatcgta  
aaaaataatgtttgatatttttttgatcgcgtgccatgggtaactcaat  
aaaatgtttgatattatataatgtaaacatcaagtatatagaaaactgag  
gtcgggtatactttttgagttcggtcgaaggggttttccattgcactca  
atattatattcaaatagatcttagacgttccataacagcttaagggtcgc  
ggattaggactgacgattaccgactgggtaaagacaagacagaattcaat  
cctgttcttgatactttgtcaatggatttataactaaatcataggctcata  
ataccttcttacgttttgcttaatcttcgcgtacatgtggtaaccgctat  
taacgttactatagttactatacactgaccataaataaaaaaaaaaccaac  
cctcaaaaattagaacagaaaccaatcgagtgttacaaatttgttaaaa  
attgtgggcacacttatgggtggcaacaattaaaaaacctatctgca  
cccctacggatgcttcatattacaaccgttgcaccccgttttttggtctt  
tacttttaactttttccgcttttcccccttttttattgaaccatttcc  
cctttgatgacaaccctcgtttctacttcatatatttgctcaataattga  
tatattcttgcaaaaaataatataagtttaaaatgtttagcttagcgcgt  
ggtttctttgaaaataaagcttagcgcgattagaatatgagtttgacca  
gctttacaaactactcattaatattaaagaataaactaactaaactaa  
ttttgttgaccaggttaagttcccatatttcggaccttatcagcggcctc  
gaccatacgcactttacacgcacttctgccccattcactcggaaatcttt  
agttcgctttgccaatcaaaatctagctatttttcttttactcgctttg  
atactattctagtttagtgattgccgacaaagtcattaacgataaggccc  
ggatcttattaaaatctgttgagcttaagtggatctttcaatatcaagcc  
tctgcttatcacgcaacaacaaaaaaatttctgactaatcgccgaaa  
cataggaatcgtatgaagattttctaaaaccggtcagctcagcccgaat  
ttaagaatttcttatcaatagggtcagttttaagcgtttgtcttgcatat  
tatttaatgccttctgcaattttgttttggtgaaaaactttctatgaag  
tcgaacattcgatgacaaaaccattataattttacgtaacattatgcaga  
gcaaggatatttggtgctcttctgcttttggtttggtttcactttcttaa  
aatccacggtagttcaaatttaccacccggtagctctgagcgtccttgg  
cctacctacaaaacaaaaataaccgattttcaacataaatttaacatagc  
atgtccttgccataaaaaatctacataaaaccatttaaaagtcaatccgca

aaagtacagaaaacgtctatacaagcaagaaaatccaacgatgcagct  
ctcttacaatTTTTTattataTTTctTTctacctgaatccgTTTTTtac  
tagttcTTTTtacgatttTTTTtagacgtgtgccaataattagttgt  
ccattaaactgaacttccacgtctttgagactttgctcaacaggctacaa  
ggaagacaaaaaactcactcagtatagctggtaaaaaaccgtcgacctc  
TTTcttactTTTctgcactccttaagccgatgTTTTgTTTacttccTgTTT  
actcgtacagcgcacgcttgaaattcaaccccgTccgtgacatctTTTT  
catgaatTTTTggctTTTTgctctcgctgTTTcattTTTcgccctgTTctc  
cattggcgttcatcccccttagacacattagttatTTTTctatagctcaaa  
tgtaaaaaggggaaatgacaaaggcacatctgagtgagTTTTgTTgtgc  
gtcccttactaactctaaaaacttctacgtgatTTTTatgtggTgtaata  
TTcctgcaagtgcagTTTTatgaaggctctaaaaaacacaagcggagT  
ggTcataagcattaaaaaatgtcTTTTaacggTcaacacatagttctgat  
TTTTatgTTTTattactgactagaaacgTaaaggTcataaaaccctcta  
ctcagcgaagataattcgcatcgacaacctatgttaaaaaaccacatcgt  
ccatatttgactctaactgactatatactTTTTgcattgaaaggaacctc  
tagctgtctcattcgaccaatttgcatatgaaaaattagcactTTtagg  
tataaaaaggaatcgatgaaatcaactcactcaactcagcgaagtacca

>dyak-Kr-proximal+distal

gggctcctaagTTaactataatcccagcttaatcactggatcagtagcta  
agtagcattTTTccggaatggaaatattggagctacctgcttaagtctaccg  
atcttgacaactgTTTTaacttaatcgTcatgcatggTcataaaaagcaa  
TTTTgctacaatttataTTTTcctatgctTTTtacctctTTtagagcagatgg  
gacctggattaggaagaaaaaatgttacgtctaccttcagaaacggatt  
aaatTTTTTcagacaaataatccagccttaagcatggTgattaagcttga  
tcccctaccaagggcgtaatatTgacggattTTTcTTaaatccctcggT  
taatctccggcttagagcgcgacgcgTTTTTTTTcgcgactccttctgcat  
TgTTTTTcactTTTcttcaattcgcaagaaggcaggcctaagaaccgaat  
gaggatcataattatggaattcctaaatacactaaggaggcagTcgaca  
TggcgttgatctacctgtaagcgtgggtTccgtTTTTgccccttgaattc  
gagactctctggTcacaggtagtcaatattccagccttgagatcgtcggc  
aattaagaagtcaaattTcacttaaaaaacaaaaaaatgtcaaaggaaaa  
acaatgcaaaaaatTgCGtaactgaactaaatccggcttaggattcttg  
catcataaacatggccaggcagcctTTTaaatttgatcattTgcatgtca  
ctctTgcaccgTaaacgaaaccgccacataagTtgaaactcagcgttatt  
agctatctcactctTTCgaccactTTTTTaaatTTTgactTgtctTTT  
ttacgaatgcaaaggaaagaatTTTTTacaaggaagtactTgtgtactTc  
cgTTTTTaatggccaattTTTattattagactTTTTTacctgctatttatt  
atggctaacaagTTTTTaaactTTcgaatcatggTtTgTTTTaaaggTca  
ataatcaacatctagaatataaacattTTTTgTaaacgctTTTTcaaaaa  
tattaactactcagaccatatcgacgtataaagTtaacgTTtaggcagaa  
atTTTTtagcaaaaggTataagTcttattttatTTtagaaaaaaataga  
caccagaagaatattTgacaaggcaagtaggcgtggatataagTtcaac  
cgagattatacatatatccaattccacctTTTcttattTaaagcaatt  
gTaaaattatactcattaccggcagggcaatccaagTtcttgattctatc  
attatgattaccagatgcgcaagctgctaattcattcaattatatttct  
TtgcatcttctacatatattaaccctTaccctTgctgtgaccccgattt  
aaaaaagccctgtgttaatggatgttatcgtcctaaaaattgTTgagat

ttttcagatcgttaccgagggtaacgacattataacgacaaaatatgtgt  
tctttatatacatatgtaaacataaaaatatctaagaaacacttcaacggc  
aaaactgagtttgagtacttcctgagttcgttcaaaaggggtttccatc  
gcattctgtattatatttaaatagatctaagccgttccatggcagcttaa  
ggttgcggtgattaggacaaaacgattatcgactggttaagacaaaacggg  
aacaaaattcaatcctgttcttgatactttgtcaacggattaaatttaa  
tcagaggctcataataccttattacgtactgcctaattcttaccgtacatg  
tggaaccgctattaacgtaactatcgttactatggactgaccataaata  
aagaaccaaaccctcaaaaaatggaacagaaacccaatcgagtgttaca  
aattgctaaaaaaaaaattgtgggcacacttatgggatgtaaacattaa  
aaaaaacctatcgtaaccctagggatgcttcaaattacaaccgttgcat  
cccatgttttagggttttactttcaactttatttccgcattttccccttt  
ttttattgaaccattatccctttgtcaacaatcctcgttgtcactccata  
tatttgctcaataactgatctcttctttcaciaaatattatagttataact  
ttttgccaaagcgcgatggtttttcttaaaataaagctaaactcgtttaaaa  
tattagttggccgcacatctttattaatttaaaaaattaacatgtaaaacta  
tacatcaatattaaacaaaaataaattaaatatgggaaacaaattatgcc  
ttataaaaaaaaaactgaatttggtgaccaaggtaagtcccctatttcgg  
acctatcaacggccacgaccatacgcactgcactacgcactactgccc  
atttacacagaaatcgttgggtccactttgccaatctaaacctagtctacc  
ttttcttttactcgctttgataatagctcgtttagtgattgtcgacaaa  
gtcatgaaagataaggcccggatcttaataaaaatcagttgagcttcaatg  
gatttttaatatcaagtcatacactgctgcttatcacgcaacaacccaa  
aaaattttctgactaatcgcagaaacctaggaattgtctgacgatgtgct  
gaaacggctcagctcagcccgaatttaagaatctcttatcaatagggct  
attttaaagcgtgttcttgcatattgttcaatgccttctgcgaattttg  
ttttgggtgaaaatctttcgatgaagtcgaccgtgctcatgccatgacaaa  
agccattctaattttacgtaacgttatgacagcaaggatgctgcttt  
tgtttggtttcactttctcaaaatccacggtagttcgaatttaccaccg  
gagctctgagcgtccttggcctacctacaaaacccaaaataccgatct  
acacacattttcagcataaatttagcacagcatgtccttgccataaaaat  
ctacataaaaccatttaaaagtcaatccgcaaaagtcacagaagacgtcc  
atgcaagcagaacattacaacgctctctaaccgttttttatgatgtttt  
ttcctacctgaatgcgttttttactagttccttttttacgattttctttt  
tagacgtgtgccaataattagtttagccattaaactgaacttccactttt  
tgagactttgctcaacaggctacaagcgaagggaaaaaactcactcagtc  
tagctggtaaaaaaagtcgacctttttcttgctttgtgcacttcttat  
gccgatgttttgtttacttctgttccactcttacagcgcacgcttgaat  
tcaaccccgctccatgacatctcttttcgtgacttttggctcttttgctct  
cgctgtttccctttcgcccagttctctattggcgttccatcccccttatcc  
agcttagataatttttataactcgaatgtaaaaaggggaaatgaccaaga  
cacatctgagtgagttttttatacgttcccttagctactttgataactcc  
tacgtgatctttatgtggagtaataattcccgaagtgcagcttttatgaa  
ggctctataaaacacaagcgggaagtggatcataggtattaaaaaatgtcct  
ttaatgggtcaacacatagttttgatgtttttatgttttatgactgactaga  
aacgcacaggtcataaaaccctcttctgagcgaagatacttttcaacggc  
atcctatgttaaaaaacctcatcgctccatattggactccagcaactaaa  
tgtcttcggcattgaaaggaactggctgtctcgttcgcactaatttgcat  
atgaaaaatcagcacttttaggtataaaaaggaaccgatgaaatccactc

actcaactcagagaagtaccca

>dpse-Kr-proximal+distal

gggctccttttagttaactataatccttgactgatcactggatcagtggt  
aagcaacatthttccgggaccgaaatgatcaatthacctgccttgccac  
tgccactgggtccactgatcatttgaacagthtaactggtataactta  
cccaggattaaactthttcttcatgcctgataataaaaaaaaaaattggt  
caatcgthttgthttgctcaggctthttacctctthttgagcagctgtcc  
cggattacgagagagaaaaaacctthttgagtctacctccaagacggatt  
aaatthtttcaacaataagtcagcttaagcatggcgattaagcttga  
tcccctgcaatggcgtaataatgatggatthttctthtaatccttatcc  
taatctccggcttagagagcggcgcgathttthttcgcggtcggctgtt  
ttgthttthttctthttctthttctthttctthttctthttctthttct  
ggcctthttggccaatgaggatcataatgatggaatccaataactga  
gaaaggcagacagagagagcactgaagctcagctacctgtaagcgtgggt  
atcgtatcctcttgcctatcacaggtaaccagaccagaccggaccagac  
tagaccagccttgagttgthttggcaattaagaagcaaatthctgcttaaa  
accaaagaaaaaagatcgcagcaaaaaaaagcaaaaaatgthttgagag  
ctgaactaaatccggattaagaatggctgtcctaaggctthttgcatcata  
aacaaggtcaggattcctagcggcattgtgcattthttgcatattaccaagg  
atcgtaaacgaatthctgcccgcgaaaaacagcctcacatagtatgtaccgac  
cataccaacaataccaaccaccctagtcagctgcctcgtcctthttcaaca  
gthttatagcttggccttgactthttacgaaagtgagcggthttgactthtt  
taccgtctgttgatgactthttcctcgcactthtaagthttthttatgattag  
tcctacctgggthttatgactthtttagagthttthtaaccggccaactgg  
aagagthttthttattaggthttacgtgaaaaatgtaacgcagctthttctg  
ggaacgaaccgaaccgaatcgatctgattthttgaaatcctgaaatcttcaaagc  
aacatgcattthctgcatgggthttcctgcaatcctggccactthttgtgtgcg  
tatattthgtcattthaaatthtagctcaggaacagcccaccgaaaagcgaaa  
tatgthttggaagtatctgcccgggtacacaccggaaatgtctgtthttctgg  
ccaagcacctthttccgctggctcattthttggaacaagacggattagccgccta  
atccccctthttgctgtaggthttactthttcatacctthttctthttctthttgctcac  
cattagcgaaacgtgttgagcaatthttaatgtgattgattgcttgcaag  
agaaaacatthttcctaggaatthttgattthtaaaaaaaaataaacagcataa  
ctaacaaaatthaaactthttgcatatcatgtattgatattggcctgc  
gggtgtccaatthttgggctagthctcctggcctcacggthttgcctaatacca  
atccatactgcaacgctcacgactagctcagctaataccttaatctctgtt  
tccgaggctgattagthttcgtctcattagcctaggatthttgtagaccgtgg  
attcattcaagaatactatgaagtctthttggtccctthttgtaaccctthttgcaa  
ttgagatgccacgtgatcatctthctccctcctthttgggtctggcgcacgct  
tggcatgcgatgaacaagccagatcaagccataggtthctgactcattaaa  
ttgatataaaacacgatcctgcccctctgcccggagtgatcctgcccctct  
catggtacacgcgtgatcagagggctctaaaaaacaagacgtgaaataca  
thtttagggatgctgtgacgthttgacgthttgacgthttggaagtgcgacaagg  
gagggtctatctgtthttctthttctthttgatatacaataaaaaatgtagtaaa  
aagcaataataacgcctgthttthttatcactgccaaccattataggthtt  
aaccaataataatctctcgaagaggtatthctgcatatthttcaatcctth  
tagccagatgccagacaatctthttgacagactgctgccaatctccgacta  
atctgcatthtttaggthttgaaacgaacgggtatggctaaaccatcc

cctgcaaggagtttccatcacattaaaaaatggggatttgagtaattttaa  
attcaacaataaatgattagtggttagtgcgaggattgcgagtttacat  
ccgcggttattacggtgtggccaaagagtgcaggaaggattgagtcca  
agtctggactgtaagtattaggattagcaaccaaatcgcatgattaagaa  
tgaagctcacagcggttccattctgaagtattcaagaacacacaagat  
caagagtgcgatggtctacctctgtcccgttcacgtctgtacttccaaca  
acattatcacgtcgttactactcgattgcctataaatcaaggaaccgcac  
cctttaaaaaaccatacacaagctgatcgagtgtacaacaaatgattaaaa  
attgtgggcacactcataggccgtacaacaataaaaaaatacccctatga  
tgttccctagggttgcttttaggcgcatgctgtgctgcgacgtgagatt  
tttaagccttcactttcactttttatctccgctttttccccttttttggc  
ctaccaatcgtctctttgttgacagcccctcgttttactcgaaatattt  
gtacaaatttgtcgttttttataaaaaaaaaaataagagttttcctcttg  
tttagctttgtgctgtttgtgtttatgtattctttcaggagggtccggt  
ctggttaagggttatgcacagcggtagaatttctatcagacgatgaaacta  
gacacgtgtagaatgatgaagtacaacacaacgcacatctgctgggatagt  
actcgtactcgtatatgaacagctattagaacagcttaatatgctggtct  
attatatataattttttttttgagaggctgcacacaacaaatagaaaaat  
atataatgagaacctactctatagtcaccaagtagtgtagcctagg  
ttagttttcaagtttgaaccttatcaacaaactatacgcactttcatac  
gcactactgccccacttatgtgcaaacatatggtcgcacaagtggtgaa  
agtctcagtcgctgaatttttcttactcttaatttcatatttaaatct  
cgttttcttttactctcgcggacactagtagtatacttgactttgctccat  
agataaccagcaacgtcttatcgcatactgcccgatcttaataaaatcat  
ttgagctaagtttctttgtcaatatcaagcgaaggcagcaaacatgtag  
aaaagtatttctgactaatccgcaaacctgggcattagctgacgatgctc  
tcgaacgagtcagatcggctcaaaaatcagaaatccttatcaatagggtc  
atttttgggtgcttgaattttgtttaatgctttctgcgaatttttgagag  
ttttgcgaaaattttcgctgaaactgatcttggtcgttgggtgacagaaa  
ccattcgaattttacgtaataattatgcagagcaaggatatccatgtcctt  
tttggctattgttcaatttcttctcgaaaatttccacggtagttcgcacat  
taccgacctgcccagttctctgttgtgttcgtccttggcctacctacgca  
aaccagcacgacgatctgggccattttcagcataagttctgcacagcat  
gtccttgccataaaaaatctacataaaacgatttagaagtcaatccgcaa  
agtcactgccaacgtttaataacaaaaataaattcaaaaaatatcca  
tgcttaaatatgtatgtacgagtagttagttagtgttttttattaaggcct  
ttgacttggttttggtttctacctggcctgtttttttatcagttcctttt  
tatgactcatttttagacgtgtgccaacaattagtaaccattacgcag  
aatatatatattccaagcattcctgaccacaggctatatagaacaacag  
tccctctcttctgttccgggatcccttaaaagtatcaaggggcaatact  
acaactggattcgtccatagagctgcccgcgacacaaagagagcgaga  
aagcagaactagaagaggggaaatggctcaccatgtagaaatacacctcg  
aaggtagatattcgttagcttccggttactcttacagcgcacgcttggg  
tttccacccatctatgacatctctttccatgaggcttgcgtctttcgct  
ccctctcttgccctatcgcctgactctcctttggcattagtttcatccc  
ttcgtttccccttctggcttatgtacaaaggggaaatctcgtttgagggg  
aaattcagttttctaccggttccgaaatagtggtcctcagatccttgctcc  
actttaaattgccttcaagtgacttttttttatgaaggcttaaaaaaa  
caagagtagcggagtggtccttaagtttttaaggcctcccataggtagcg

catagttttgattttttatgtactgcagaatataaaaatgcagt  
gtcataaaatcgtgaagggttttttacacgtacggcgaaagtatttgac  
taaaagtcaacattttttggtgaactgtagaggacataagtatgtgtgt  
cagtacataaggacaccacgcttttgagatttttaaatgtgctagctatc  
cctgtcgctccaatttgcataggaatacaacagtcgtctgtctcttag  
gtaaaaagta

>dmel-Kr-proximal+distal-lambda

gggatcctaagttaactataatccaggcttaactactggatcaataactaagtagcattttccggg  
atggaaatatgaagttacctgcatatgcctaccgatcctgaaaactgctttaacttaatcgacatg  
catgatcataaaaagcaatttgctacaatttatatgtttttgcttttccttcttttaagcatctgg  
gatctggatcagaaaagaaaaagtgtaacgcctaccttcagaaaacggattaaatttttcagacaa  
ataatccagccttaagcatggtgattaagccttgatcccctaccaagggcgtaatatgacggatt  
ttccttaaatccctctgttaattctccggcttagagcgcgacgcgttttttcgagactccgctgca  
ttgtttttttttcagtttctcaattcgcaagaaggcaggcctatggaccgaatgaggatcataa  
ttatggaattcctaaataaactaagaagggcagtcggcatagtagtattgatctacctgtaagcgtggg  
ttctatctttgcccctcgcattcgagactctctagtcacaggtagaccagccttgagttcgtcggc  
aattaagaagtcaaatttctcttaaaaaacaacaaaaatgtcaaagtaaaaaaatgcaaaaaata  
tgtgtaactgaactaaatccggccttaggattcttgctcataaacatgactagggagccattaaaa  
tttgataatttgcatgtcactgtgcaccgtaaacgaagccaacacatcggctgaaaccagcgtc  
atztatgctatgctatctcactcttttgcataattttttaattattgacttgtcttttttacga  
atgcaaaggaagtagtctgtgacttccggtttttcaaagtcggattttattatctacctgcaattta  
taatgacaaccaagtttttaacattccaaaacgtaggttttttgagttcaataagccttattttta  
aaggctcttttcgaaccacattaacatttgccggttacgtttttgtagaaatttccatagctgcat  
aaaggtacaagttttcatttatgtgatgggaaaatgaattagagaccagcagatctttaacagaaa  
caaaaaggcgtggatattgttatatgtacaaaaacaacatgaccctgcgtcgctgcccggatgaag  
atccgcagaatctggcggaccggcctaccgcccgcgtcgcatcatcatgcagaacatgctgtgacg  
aagagctggccattgctcaggtcgaagagatgcaggcagttctgcccgtgcttaagggcaataca  
ccatgaccggggaagccttcgatccgggttaggtggatattgggcccagtgaggagaataacatca  
cgcagtccggcggcacggagtgagcaagcgtgacaagtccacgatgaccggaccgacgatatcg  
aagcctacgcgctgaacgccagcgggtgtggtgaatatcatcgtgttcgatccgaaaggctgggccc  
tgttccgttcttcaaagccgtcaaggagaagctggatacccgctggtgcttaattccgagctgg  
agacagcggtgaaagacctgggcaaacgggtgtcctataaggggatgtatggcgatgtggccatcg  
tcgtgtattccggacagtagcgtggaacggcgtcaaaaagaacttctgcccggacaacacgatgg  
tgctggggaacactcaggcacgaggctctgcccacatttgctgacattcaggatgcccagcagc  
gccaagggcattaacgcctctgcccgttaccgaaaaactgggtgaccaccggcgatccggcgcgtg  
agttaccatgattcagtcagcaccgctgatgctgctggctgaccctgatgagttcgtgtccgtac  
aactggcgtaatcatggcccttcggggccattgtttctctgtggaggagtccatgacgaaagatga  
actgattgcccgtctccgctcgtggtgaaactgaaccgtgatgtcagcctgacggggacgaa  
agaagaactggcgtctccgtgtggcagagctgaaagaggagcttgatgacacggatgaaactgcccg  
tcaggacaccctctcagccgggaaaatgtgctgaccggacatgaaaatgaggtgggatcagcgc  
gccggataccgtgattctggatacgtctgaactggtgtaagtcccatatttcggaccttatcagc  
ggcctcgaccatacgcacttttacacgcacttctgcccattcactcgaaaatcttttagttcgttt  
gccaatcaaaatctagtctatttttcttttactcgtttgatactattctagtttagtgattgccc  
acaaagtcattaacgataaggcccggatcttattaaaatctgttgagcttaagtggatctttcaat  
atcaagcctctgcttatcagcaaacacaaaaaaatcttgactaatcgccgaaacataggaa  
tcgatgaagattttctaaaaccggctcagctcagcccgaatttaagaatttcttatcaatagggt  
cagttttaagcgttttgcttgcatatttttaaatgccttctgcgaattttgttttggtgaaaaact  
ttctatgaagtcgaacattcgatgacaaaaccattataattttacgtaacattatgcagagcaagg

atatttggtgctcttctgcttttggtttggtttcactttcttaaaatccacggtagttcaaattta  
ccacccggtagctctgagcgtccttggcctacctacaaaacaaaaataccgattttcaacataa  
atthaacatagcatgtccttgccataaaaatctacataaaaccatttaaaagtcaatccgcaaaag  
tcacagaaaacgtctatacaagcaagaaaatttcaacgatgcagctctcttacaattttttattat  
atttcctttctacctgaatccggttttttactagttccttttttacgatttcttttttagacgtgtgc  
caataattagttgtccattaaactgaacttccacgtcctttgagactttgctcaacaggctacaagg  
aagacaaaaaactcactcagtatagctggtaaaaaaccgtcgaccttctttcttactttctgcact  
ccttaagccgatgttttggttacttccgttttactcgtacagcgcagccttgaaattcaaccccgt  
ccgtgacatctcttttcatgaattttggctcctttgctctcgtctgtttcattttcgccctgttctc  
cattggcggttcatcccccttagacacattagttattttctatagctcaaagttaaaaaaggggaaat  
gacaaaggcacatctgagtgagtttttggtgtgctcccttactaactctaaaaacttctacgtga  
tctttatgtggtgtaaatattcctgcaagtgcagtttttatgaaggctctaaaaaacacaagcggaa  
gtggtcataagcattaaaaaatgtcctttaaaccggtcaacacatagttctgattttttatgttttat  
tactgactagaaacgtaaaggctataaaacccttactcagcgaagataattcgcacgacaacct  
atgttaaaaaaccacatcgtccatatttgactcctaactgactataatcttttgattgaaaggaa  
cctctagctgtctcattcgcaccaatttgcatatgaaaaattagcacttttaggtataaaaaggaa  
tcgatgaaatcaactcactcaactcagcgaagtacca

>dpse-Kr-proximal+distal-lambda

gggctccttagttaactataatccttgactgatcactggatcagtggttaagcaacattttccgg  
gaccgaaatgatcaatttacctgccttggccactgccactgggtccactgatcattgaaacagtt  
taactgggtataacttaatcccaggattaaactttttcttcatgcctgataataaaaaaaaaattgg  
tacaattcgtttggtttgctcaggcctttacctcttttgagcagctgtccctcggattacgagaga  
gaaaaaacactttgagctacctccaaagacggattaaatttttcaacaaataagtcagctcta  
agcatggcgattaagcttgatccccctgcaatgggcgtaaatattgatggattttcctttaaactcct  
atcctaatactccggcttagagagcggcgcgatttttttcgaggctcggctgtttttggtttttctt  
ttctttccttttcttttcttcaattcgcaagaacgcaggcctttgggccaatgaggatcataatt  
atggaattccaaaatacactgagaaaggcagacagagagagcactgaagctcagctacctgtaagc  
gtgggtatcgtatcctcttcgcctatcacaggtaaccagaccagaccgaccagactagaccagcc  
ttgagttggtggcaattaagaagtcaaatctcgcttaaaaaccaaagaaaaaaagatcgcagcaaa  
aacaagcaaaaaatggtgagagctgaactaaatccggattaagaatggctgtcctaaggtcttt  
gcatcataaacaaggtcaggattccttagcggcattgtgcatattaccaacggatcgtaaa  
cgaattcgcgcgcaaaacagcctcacatattgtatgtaccgaccataccaacaataccaaccacct  
agtcagctgcctcgtcctttccaacagtttatagctctggccttgactttttacgaaagtgagcgg  
ttgacttttttacctgctgttgatgacttgcttccgcactttaaagttttttatgattagtcctac  
ctggggtttatgactatttagagttttttaaaccggccaaactggaagagttttatgaccctgcgtc  
gcctgccggatgaagatccgcagaatctggcggaccggcttaccgccgcgctcgcacatcatgc  
agaacatgctgacgaagagctggccattgctcaggtcgaagagatgcaggcagtttctgccgtgc  
ttaagggcaatacacatgaccgggtgaagccttcgatccggttgaggtggatatgggccgcagtg  
aggagaataacatcacgcagctccggcggcacggagtgagcaagcgtgacaagtccacgtatgacc  
cgaccgacgatatcgaagcctacgcgctgaacgccagcgggtgtggtgaatatcatcgtgttcgatc  
cgaaaggctgggcgctgttccgttcccttcaaagccgtcaaggagaagctggataaccgctcgtggct  
ctaattccgagctggagacagcgggtgaaagacctgggcaaaagcgggtgtcctataaggggatgtatg  
gcatgtggccatcgtcgtgtattccggacagctcgtggaaaaccggctcaaaaagaacttccctgc  
cggacaacacgatggtgctggggaacactcaggcacgcggtctgcgcacctatggctgcattcagg  
atgaggacgcacagcgcgaaggcattaacgcctctgccggttaccgaaaaactgggtgaccaccg  
gcatccggcgcgctgagttcaccatgattcagtcagcaccgctgatgctgctggctgaccctgatg  
agttcgtgtccgtacaactggcgtaatcatggcccttcggggccattgtttctctgtggaggagtc  
catgacgaaagatgaactgattgccctcctcgcctcgtgggtgaacaactgaaccgtgatgtcag

cctgacggggacgaaagaagaactggcgctccgtgtggcagagctgaaagaggagcttgatgacac  
ggatgaaactgccggtcaggacacccctctcagccgggaaaatgtgctgaccggacatgaaaatga  
ggtgggatcagcgcagccggataccgtgattctggatacgtctgaactggtcacggctcgtggcact  
ggtgaagctgcatactgatgcacttcacgccacgcgggatgaaacctgtggcatttctgctgccggg  
aacggcgtttctgtgtctctgccggtgtggcagccgaaatgacagagcgcggcctggccagaatgca  
ataacgggaggcgtgtggctgatttcgataacctgttcgatgctgccattgccgcgccgatgaa  
acgatacgcgggtacatgggaacgtcagccaccattacatccgggtgagcagtcagggtgcggtgata  
cgtggtgtttttgatgaccctgaaaatacagctatgccggacagggcgtgcgcttgaaggctcc  
agcccgctccctgtttgtccggactgatgagggtgcccagctgcccgtggagacacgctgaccatc  
ggtgaggaaaatttctgggtagatcgggtttcgcgggatgatggcggaaagtgtcatctctggctt  
ggacggggcgtaccgcctgccgttaaccgtcgcgctgaaagggggatgtatggccataaaaggctc  
ttgagcaggccgttgaaaacctcagccgtatcagcaaacggcgggtgcctgggtgccgcgccaatgg  
ccattaaccgcgttgcctcatccgcgatatcgcagtcggcgtcacaggttgcccgtagacaaagg  
tacgccggaaaactggtaaaggaaagggccaggctgaaaagggccacgggtcaaaaatccgcaggcca  
gaatcaaagttaaccgggggggatttgcctgtaatacaagctgggtaatgcccgggttctccttccg  
gccgcaggcgtcgtaaaaagggcagcgttcatccctgaaaggtggcggcagcgtgcttgtgggtgg  
gtaaccgtcgtattcccggcgcggttattcagcaactgaaaaatggccgggtggcatgtcatgcagc  
gtgtggctgggaaaaaccgttaccctcattgatgtgggtgaaaatcccgatggcgggtgccgctgacca  
cggcgtttaaaaaatattgagcggatacggcgtgaaactcttccgaaagagctgggctatgccc  
tgagcatcaactgagttagttttcaagtttgaaccttatcaacaaactatacgcactttcatac  
gcactactgccccacttatgtgcaaacatatggtcgcacaagtgtgtgaaagtctcagtcgctgaa  
tttttcttactcttaatttcatatttaaaatctcgtttttcttttactctcgcggcagacttagtat  
acttgactttgctccatagataaccagcaacgtcttatcgcatactgccggatcttaataaaatc  
atitgagctaagtttctttgtcaatatcaagcgaaggcagcaaacatgtagaaaagtatttctga  
ctaaccgcaaacctgggcattagctgacgatgctctcgaacgagtcagatcggctcaaaaatcag  
aaatccttatcaatagggctatttttgggtgcttgaattttgtttaatgctttctgcaatttttg  
agagttttgcaaaaattttcgtgaaactgatctgttctggttgacagaaaccattcgaattt  
tacgtaatatattatgacagcaaggatatccatgtcctttttggctattgttcaatttactttcga  
aaatttccacggtagttcgcattaccgcctgccgagttctctgttgtgttctccttggcctacc  
tacgcaaaccagcagcagatctgggcccattttcagcataagtctgcacagcagatgtccttgcca  
taaaaatctacataaaaacgatttagaagtcaatccgcaaaagtcactgccaacgtttaataacca  
aaaataaattccaaaaaatatccatgcttaaatatgtatgtacgagatgttgactgttttttatt  
aaggccctttgacttggttttggtttctacctggcctgttttttatcagttccttttttatgactc  
attttttagacgtgtgccaacaattagtaaccattacgcagaatatatatattcccaagcattcc  
tgaccacaggctatatagaacaacagtcctctcttctggttcggggatcccttaaaagtatcaag  
gggcaatactacaactggattcgtccatagagctgccgcgcgacacaaagagagcgagaaagcag  
aactagaagaggggaaatggctcaccatgtagaatacacctcgaaggatgatatttcgctagcttc  
cggttcactcttacagcgcagcgttggatttccaccccatctatgacatctctttccatgaggctt  
gcttcttccgctccctctcttggcctatcgcctgactctcctttggcatttagtttcatcccttccg  
tttcccttctggcttatgtacaaaggggaaatttctgtttgaggggaaattcagttttctaccgct  
ttcgaaatagtgccctcagatccttgctccactttaaattgccttcaagtgacttttttttatga  
aggctctaaaaaaacaagagtagcggaaagtggccttaagtttttaaggcctcccataggtagcgca  
tagttttgattttttattttttatgactgcagaatataaaaatgcagtgctataaaaatcgtgaagg  
ttttttacagtacggcgaagttatttgactaaaagtcaacatttttttgggtgaaactgttagagg  
acataagtatgtgtgtcagtacataaggacaccacgcttttgagatttttaaatgtgctagctatc  
cctgtcgcctccaatttgcataaggaaaaatcaacagtcgctctgtctcttaggtaaaaagta

>Kr-chimera-dmel-proximal+dpse-distal

gggctccttagttaactataatccttgactgatcactggatcagtggtcaagcaacattttccgg



gaccgaaatgatcaatthacctgccttggcccactgcccactgggtccactgatcatttgaacagtt  
taactggataacttaatcccaggattaaactttttcttcatgcctgataataaaaaaaaaattgg  
tacaattcgtttgtttgtcaggcttttacctcttttgagcagctgtccctcggattacgagaga  
gaaaaaacactttgagtctacctccaagacggattaaatttttcaacaaataagtcagtccta  
agcatggcgattaagcttgatccccctgcaatgggcgtaatatattgatggattttcctttaaatcctt  
atcctaatactccggcttagagagcggcgatTTTTTTCGCGGCTCGGTCTGTTTTGTTTTTCTT  
TCTTTCTTTTCTTTTCTTCAATTCGCAAGAACGCAGGCCTTTGGGCCAATGAGGATCATAATT  
ATGGAATTCAAAATACTGAGAAAGGCAGACAGAGAGACTGAAGCTCAGCTACTGTAAGC  
GTGGGTATCGTATCCTCTTCGCCTATCACAGGTAACCAGACCAGACCAGACTAGACCAGCC  
TTGAGTTGTTGGCAATTAAGAAGTCAAATTCGCTTAAAAACCAAGAAAAAAGATCGCAGCAA  
AACAAAGCAAAAATGTTGCAGAGCTGAACTAAATCCGGATTAAGAATGGCTGTCCTAAGGTCTT  
GCATCATAAACAAGGTCAGGATTCCTAGCGGCATTGTGCATTTGCATATTACCAACGGATCGTAA  
CGAATTCGCCGCAAAAACAGCCTCACATATGTATGTACCGACCATAACCAATAACCAACCCT  
AGTCAGCTGCCTCGTCTTTTCCAACAGTTTATAGTCTGGCCTTGACTTTTTACGAAAGTGAGCGGT  
TTGACTTTTTTACCCTCTGTTGATGACTTGCTTCCGCACCTTAAAGTTTTTATGATTAGTCTTAC  
CTGGGTTTTATGACTATTTAGAGTTTTTTAAACCGGCCAAACTGGAAGAGTTTTATGACCCTCGCTC  
GCCTGCCGGATGAAGATCCGCAGAATCTGGCGGACCCGGCTTACCGCCCGCTCGCATCATCATGC  
AGAACATGCGTGACGAAGAGCTGGCCATTGCTCAGGTCGAAGAGATGCAGGCAGTTTCTGCCGTGC  
TTAAGGGCAATAACCATGACCAGGTGAAGCCTTCGATCCGGTTGAGGTGGATATGGGCCGCAGTG  
AGGAGAATAACATCACGCAGTCCGGCGGCAGGAGTGGAGCAAGCGTGACAAGTCCACGTATGACC  
CGACCAGCATATCGAAGCCTACGCCTGAACGCCAGCGGTGTGGTGAATATCATCGTGTTCGATC  
CGAAAGGCTGGGCGCTGTTCCGTTCTTCAAAGCCGTCAAGGAGAAGCTGGATAACCCGTCGTGGCT  
CTAATTCGAGCTGGAGACAGCGGTGAAAGACCTGGGCAAAGCGGTGTCCTATAAGGGGATGTATG  
GCGATGTGGCCATCGTCTGTGATTCGCGACAGTACGTGGAAAACGGCGTCAAAAAGAATTCCTGC  
CGGACAACACGATGGTGTGGGGAACACTCAGGCACGCGGTCTGCGCACCTATGGCTGCATTCAGG  
ATGCGGACGCACAGCGCAAGGCATTAACGCCTCTGCCGTTACCCGAAAAACTGGGTGACCACCG  
GCGATCCGGCGCGTGAGTTCACCATGATTCAGTCAGCACCGCTGATGCTGCTGGCTGACCCTGATG  
AGTTCGTGTCCGTACAACCTGGCGTAATCATGGCCCTTCGGGGCCATTGTTTCTCTGTGGAGGAGTC  
CATGACGAAAGATGAAC TGATTGCCGCTCTCCGCTCGCTGGGTGAACAACCTGAACCGTGATGTCAG  
CCTGACGGGGACGAAAGAAGAACTGGCGCTCCGTTGTGGCAGAGCTGAAAGAGGAGCTTGATGACAC  
GGATGAAACTGCCGGTCAGGACACCCCTCTCAGCCGGGAAAATGTGCTGACCGGACATGAAAATGA  
GGTGGGATCAGCGCAGCCGGATAACCGTATTCTGGATACGCTCTGAAC TGGTGTAAGTTCCCATATT  
TCGGACCTTATCAGCGGCCTCGACCATAACGACTTACACGCACCTCTGCCCCATTCACTCGGAAA  
TCTTTAGTTCGCTTTGCCAATCAAAATCTAGTCTATTTTTCTTTTACTCGCTTTGATACTATTCTA  
GTTTAGTGATTGCCGACAAAGTCATTAACGATAAGGCCCGGATCTTATTAATACTGTTGAGCTTA  
AGTGGATCTTTCAATATCAAGCCTCTGCTTATCACGCAACAACCAAAAAAATTTCTGACTAATC  
GCCGAAACATAGGAATCGTATGAAGATTTTCTAAAACCGGTCAGCTCAGCCCAGAAATTAAGAATT  
TCTTATCAATAGGGTCAGTTTTAAGCGCTTTGCTTGATATTATTAATGCCTTCTGCGAATTTG  
TTTTGGTGAAAAACTTCTATGAAGTCGAACATTCGATGACAAAACCATTATAATTTTACGTAACA  
TTATGCAGAGCAAGGATATTTGTGTGCCTTTCTGCTTTTGTGGTTTCACTTCTTAAAATCCAC  
GGTAGTTCAAATTTACCACCCGGTGAGCTCTGAGCGTCTTGGCCTACCTACAAAACCAAAAATAC  
CGATTTTCAACATAAATTTAACAATAGCATGTCCTTGCCATAAAAATCTACATAAAACCATTTAAA  
GTCAATCCGCAAAAGTCACAGAAAACGTCTATAAAGCAAGAAAATTTCAACGATGCAGCTCTCTT  
ACAATTTTTATTATATTTCTTTCTACTGAATCCGTTTTTTACTAGTTCTTTTTTACGATTTCT  
TTTTAGACGTGTGCCAATAATTAGTTGTCCATTAAC TGAAC TCCACGTCTTTGAGACTTTGCT  
CAACAGGCTACAAGGAAGACAAAAA ACTCACTCAGTATAGCTGGTAAAAAACCGTCGACCTTCTT  
CTTACTTTCTGCACCTCTTAAGCCGATGTTTTGTTTACTTCTGTTTACTCGTACAGCGCACGCTT  
GAAATTC AACCCGTCGCTGACATCTCTTTT CATGAATTTGGCTCTTTTGTCTCTCGCTGTTT CAT  
TTTTGCCCTGTTCTCCATTGGCGTT CATCCCCCTTAGACACATTAGTTATTTTCTATAGCTCAAAAT

gtaaaaaggggaaatgacaaaggcacatctgagtgagtttttgttggtgcgtcccttactaactcta  
aaaacttctacgtgatctttatgtgggtgtaatatctcctgcaagtgagtttttatgaaggctctaa  
aaaacacaagcgggaagtggtcataagcattaaaaaatgtcctttaacgggtcaacacatagttctga  
ttttttatgttttattactgactagaaacgtaaaggtcataaaaccctctactcagcgaagataat  
tcgcatcgacaacctatgttaaaaaacacatcgtccatatttgactctaactgactatataatctt  
ttgcattgaaaggaacctctagctgtctcattcgcaccaatttgcatatgaaaaattagcactttt  
aggataaaaaggaatcgatgaaatcaactcactcaactcagcgaagtaccca

>Kr-chimera-dpse-proximal+dmel-distal

gggatcctaagttaactataatccaggcttaatcactggatcaataactaagtagcattttccggg  
atggaatatgaagttacctgcatatgcctaccgatcctgaaaactgctttaacttaatcgacatg  
catgatcataaaaagcaatttgctacaatttataatTTTTTTTgcttttcttcttttaagcatctgg  
gatctggatcagaaaagaaaaagtgtaacgcctacctcagaaaacggattaaatTTTTTcagacaa  
ataatccagccttaagcatgggtgattaagcttgatcccctaccaaggggcgtaatatgacggatt  
ttccttaaatccctctgttaatctccggcttagagcgcgacgcgtTTTTTcgcgactccgcctgca  
ttgtTTTTTTTTTcagtttctcaattcgcaagaaggcaggcctatggaccgaatgaggatcataa  
ttatggaattcctaataaactaagaagggcagtcggcatagtagtattgatctacctgtaagcgtggg  
ttctatctttgccccctcgcattcgagactctctagtcacaggtagaccagccttgagttcgtcggc  
aattaagaagtcaaatttctcttaaaaaacaacaaaaatgtcaaagtaaaaacaatgcaaaaaata  
tgtgtaactgaaactaaatccggccttaggattcttgctgcataaacatgactagggagccattaaaa  
tttgataatttgcatgtcacttgtgcaccgtaaacgaagccaacacatcggctgaaaccagcgtc  
atztatgctatgctatctcactcttttgcataatTTTTTaaattattgacttgtctTTTTTtacga  
atgcaaaggaagtacttgtgtacttccgTTTTTcaaagtcggattttattatctacctgcaattta  
taatgacaaccaagTTTTTaaacattccaaaacgtggTTTTTgagttcaataagcttcattTTTTT  
aaggctctTTTTTcgaaccacattaacatttgcggttacgTTTTTgtagaaattttccatagctgcat  
aaaggtacaagTTTTTcatttatTTTgatgggaaaatgaattagagaccagcacgatctttaaagaaa  
caaaaaggcgtggatattgttatatgtacaaaaacaacatgaccctgcgtcgcctgccggatgaag  
atccgcagaatctggcggaccggccttaccgcccgcgtcgcacatcatcatgcagaacatgcgtgacg  
aagagctggccattgctcaggtcgaagagatgcaggcagttctgcctgcttaagggcaataca  
ccatgaccgggtgaagccttcgatccggTTTgaggtggatatgggcccagtgaggagaataacatca  
cgcagtcggcggcacggagtgagcaagcgtgacaagtcacgatgacccgaccgacgatatcg  
aagcctacgcgctgaacgccagcgggtggtggaatatcatcgtgttcgatccgaaaggctgggccc  
gttccgTTTcctcaaagccgtcaaggagaagctggatacccgctcgtggctctaattccgagctgg  
agacagcggTgaaagacctgggcaaagcgggtgtcctataaggggatgtatggcgatgtggccatcg  
tcgtgtattccggacagtagctggaaaacggcgtcaaaaagaacttctgcccggacaacacgatgg  
tgctggggaacactcaggcacgcggctctgcgcacctatggctgcattcaggatgcggacgcacagc  
gcaaggcattaacgcctctgcccgttaccgaaaaactgggtgaccaccggcgatccggcgcgtg  
agttcaccatgattcagtcagcaccgctgatgctgctggctgaccctgatgagttcgtgtccgtac  
aactggcgtaatcatggccctcggggccattgtttctctgtggaggagtccatgacgaaagatga  
actgattgcccgtctccgctcgtggtgaaactgaaccgtgatgtcagcctgacggggacgaa  
agaagaactggcgtccgtgtggcagagctgaaagaggagcttgatgacacggatgaaactgcccgg  
tcaggacaccctctcagccgggaaaatgtgctgaccggacatgaaaatgaggtgggatcagcgc  
gccggataccgtgattctggatacgtctgaaactgggtgttagTTTTTcaagTTTgaaacttatcaac  
aaactatacgcactttcatacgcactactgccccacttatgtgcaaacatattggtcgcacaagtg  
gtgaaagtctcagtcgtcgaatttttcttactcttaatttcatatttaaaatctcgttttcttt  
actctgcccgcactagtagtatactttagctttgctccatagataaccagcaacgtcttatcgcata  
ctgcccgatcttaataaaatcattttgagctaagtttctttgtcaatatcaagcgaaggcagcaaa  
catgtagaaaagtatttctgactaatccgcaaacctgggcatttagctgacgatgctctcgaacgag  
tcagatcggctcaaaaatcagaaatccttatcaatagggtcatttttgggtgcttgaattttgttt

aatgctttctgCGAATTTTTGAGAGTTTTGCGAAAATTTTCGCTGAAACTGATCTTGTTGTTGGT  
TGACAGAAACCATTCGAATTTTACGTAATATTATGCAGAGCAAGGATATCCATGTCCTTTTTGGCT  
ATTGTTCAATTTCACTTTGAAAATTTCCACGGTAGTTCGCATTACCCGCCTGCCGAGTTCCTGT  
TGTGTTGCTCCTTGGCCTACCTACGCAACCAGCACGCATCTGGGCCATTTTCAGCATAAGTT  
CTGCACAGCATGTCCTTGCCATAAAAACTACATAAACGATTTAGAAGTCAATCCGCAAAAGTCA  
CTGCCAACGTTTAAATAACCAAAAATAAATTCAAAAAATATCCATGCTTAAATATGTATGTACGA  
GTATGTTGACTGTTTTTTATTAAGGGCCTTTGACTTGGTTTTGGTTTCTACCTGGCCTGTTTTTA  
TCAGTTCCTTTTTTATGACTCATTTTTTAGACGTGTGCCAACAATTAGTAACCCATTACGCAGAAT  
ATATATATTCCCAAGCATTCTGACCACAGGCTATATAGAACAACAGTCCCTCTCTTCTGTTGCG  
GGATCCCTTAAAAGTATCAAGGGGCAATACTACAACCTGGATTGCTCCATAGAGCTGCCGCGCGAC  
ACAAGAGAGCGAGAAAGCAGAACTAGAAGAGGGGAAATGGCTCACCATGTAGAAATACACCTCGA  
AGGTGATATTTGCTAGCTTCCGGTTCACTCTTACAGCGCACGCTTGGATTTCCACCCCATCTATG  
ACATCTCTTCCATGAGGCTTGCCTCTTTCGCTCCCTCTTGGCCCTATCGCTGACTCTCCTTGT  
GCATTAGTTTCATCCCCTTCGTTTCCCCTTCTGGCTTATGTACAAAGGGGAAATTTGTTTTGAGGG  
GAAATTCAGTTTTCTACCGTTTCGAAATAGTGGCCTCAGATCCTTGCTCCACTTTAAATTGCCTT  
CAAGTGCACTTTTTTTTATGAAGGCTCTAAAAACAAGAGTAGCGGAAGTGGCCTTAAGTTTTTA  
AGGCCTCCCATAGGTAGCGCATAGTTTTGATTTTTTATTTTTTATGACTGCAGAAATAAAAAATGC  
AGTGTCAAAAATCGTGAAGGTTTTTACACGTACGGCGCAAAGTTATTTGACTAAAAGTCAACAT  
TTTTTGGTGAACGTAGAGGACATAAGTATGTGTGTCAGTACATAAGGACACCACGCTTTTGAGA  
TTTTTAAATGTGCTAGCTATCCCTGTCGCTCCAATTTGCATAGGAAAAATCAACAGTCTGCTGCT  
CTTAGGTA AAAAGTA

Supplemental File 2 – PWMs for the TFs used in this study, Related to Figure 3

Frequency matrices used in Figure 3A  
Columns correspond to A C G T  
Rows correspond to binding site positions  
Data is from FlyFactorSurvey

>bcd\_NAR\_FBgn0000166

|                  |                  |                  |                  |
|------------------|------------------|------------------|------------------|
| 0.10824742268    | 0.314432989691   | 0.10824742268    | 0.469072164948   |
| 0.211340206186   | 0.10824742268    | 0.00515463917526 | 0.675257731959   |
| 0.932989690722   | 0.00515463917526 | 0.00515463917526 | 0.0567010309278  |
| 0.984536082474   | 0.00515463917526 | 0.00515463917526 | 0.00515463917526 |
| 0.0567010309278  | 0.00515463917526 | 0.262886597938   | 0.675257731959   |
| 0.00515463917526 | 0.881443298969   | 0.00515463917526 | 0.10824742268    |
| 0.00515463917526 | 0.469072164948   | 0.00515463917526 | 0.520618556701   |

>Stat92E

|             |             |             |             |
|-------------|-------------|-------------|-------------|
| 0.003289474 | 0.003289474 | 0.003289474 | 0.990131579 |
| 0.003289474 | 0.003289474 | 0.003289474 | 0.990131579 |
| 0.003289474 | 0.990131579 | 0.003289474 | 0.003289474 |
| 0.069078947 | 0.694078947 | 0.134868421 | 0.101973684 |
| 0.134868421 | 0.463815789 | 0.365131579 | 0.036184211 |
| 0.101973684 | 0.134868421 | 0.661184211 | 0.101973684 |
| 0.003289474 | 0.003289474 | 0.990131579 | 0.003289474 |
| 0.990131579 | 0.003289474 | 0.003289474 | 0.003289474 |
| 0.990131579 | 0.003289474 | 0.003289474 | 0.003289474 |

>vfl\_SOLEXA\_5\_FBgn0259789

|                  |                  |                  |                  |
|------------------|------------------|------------------|------------------|
| 0.160636124891   | 0.218996206595   | 0.286110300554   | 0.33425736796    |
| 0.195823483058   | 0.161675860257   | 0.333727344366   | 0.308773312319   |
| 0.189256632519   | 0.156422379827   | 0.307459942212   | 0.346861045443   |
| 0.152482269504   | 0.278565799842   | 0.311400052535   | 0.257551878119   |
| 0.0710533228264  | 0.00013133701077 | 0.62792224849    | 0.300893091673   |
| 0.00932492776464 | 0.983845547675   | 0.00013133701077 | 0.00669818754925 |
| 0.993039138429   | 0.00144470711847 | 0.00144470711847 | 0.00407144733386 |
| 0.00013133701077 | 0.00013133701077 | 0.960204885737   | 0.0395324402417  |
| 0.00144470711847 | 0.00013133701077 | 0.985158917783   | 0.0132650380877  |
| 0.00538481744156 | 0.00013133701077 | 0.00407144733386 | 0.990412398214   |
| 0.993039138429   | 0.00669818754925 | 0.00013133701077 | 0.00013133701077 |
| 0.0999474651957  | 0.098634095088   | 0.743498817967   | 0.0579196217494  |
| 0.190570002627   | 0.266745468873   | 0.302206461781   | 0.240478066719   |
| 0.186451956348   | 0.302235826457   | 0.222384881554   | 0.28892733564    |
| 0.239722143465   | 0.140487666572   | 0.392826764956   | 0.226963425007   |

>hb\_NAR\_FBgn0001180

|                  |                  |                  |                  |
|------------------|------------------|------------------|------------------|
| 0.00378787878788 | 0.723484848485   | 0.117424242424   | 0.155303030303   |
| 0.950757575758   | 0.00378787878788 | 0.0416666666667  | 0.00378787878788 |
| 0.799242424242   | 0.193181818182   | 0.00378787878788 | 0.00378787878788 |
| 0.988636363636   | 0.00378787878788 | 0.00378787878788 | 0.00378787878788 |

|                |                  |                  |                  |
|----------------|------------------|------------------|------------------|
| 0.988636363636 | 0.00378787878788 | 0.00378787878788 | 0.00378787878788 |
| 0.988636363636 | 0.00378787878788 | 0.00378787878788 | 0.00378787878788 |
| 0.988636363636 | 0.00378787878788 | 0.00378787878788 | 0.00378787878788 |
| 0.950757575758 | 0.0416666666667  | 0.00378787878788 | 0.00378787878788 |
| 0.458333333333 | 0.382575757576   | 0.00378787878788 | 0.155303030303   |
| 0.458333333333 | 0.420454545455   | 0.117424242424   | 0.00378787878788 |

## Supplemental References

Aerts S, Van Loo P, Thijs G, Mayer H, de Martin R, Moreau Y, De Moor B. (2005). TOUCAN 2: the all-inclusive open source workbench for regulatory sequence analysis. *Nucleic Acids Res* 33, W393-W396.

Harrison, M. M., Li, X. Y., Kaplan, T., Botchan, M. R., and Eisen, M. B. (2011). Zelda binding in the early *Drosophila melanogaster* embryo marks regions subsequently activated at the maternal-to-zygotic transition. *PLoS Genet* 7, e1002266.

MacArthur, S., Li, X. Y., Li, J., Brown, J. B., Chu, H. C., Zeng, L., Grondona, B. P., Hechmer, A., Simirenko, L., Keranen, S. V., Knowles, D. W., Stapleton, M., Bickel, P., Biggin, M. D., and Eisen, M. B. (2009). Developmental roles of 21 *Drosophila* transcription factors are determined by quantitative differences in binding to an overlapping set of thousands of genomic regions. *Genome Biol* 10, R80.
